# Supplementary material for: Drop-on-demand microdroplet generation: a very stable platform for single-droplet experimentation
Source: Royal Society of Chemistry journal article supplement (doi:10.1039/c6ra08472a), 2016-01-01
Supplement: c6ra08472a1.pdf [file c6ra08472a1.pdf]

# **Drop-on-Demand microdroplet generation: a very stable platform for single-droplet experimentation**

Bartholomew S. Vaughn, Philip J. Tracey, Adam J. Trevitt\*

*School of Chemistry, University of Wollongong, New South Wales, 2522, Australia*

**\*corresponding author: [adamt@uow.edu.au](mailto:adamt@uow.edu.au)**

## Supplementary Information

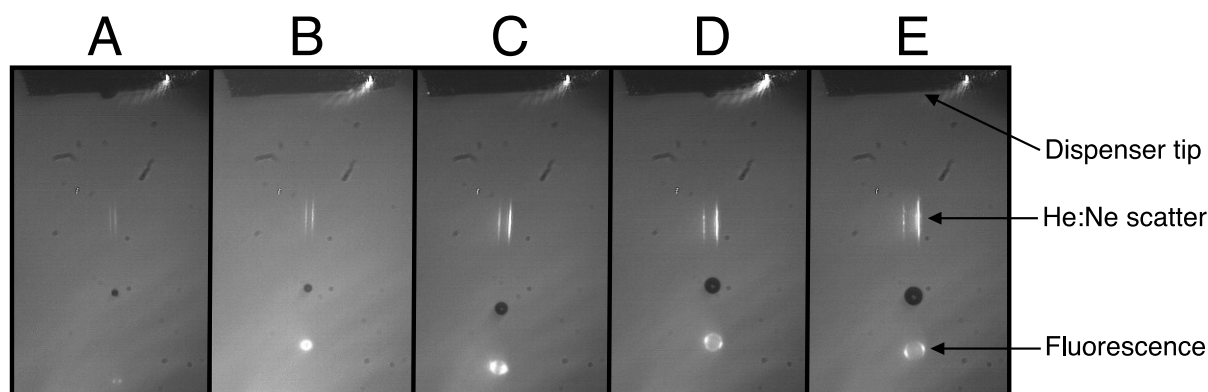

Figure S1 Bright-field images of the droplet interaction region. Each frame shows the dispenser capillary tip, sync laser scattering, fluorescence emission and the resulting droplet from the corresponding waveforms in Figure 1.

TABLE S1. Parameters of the waveforms shown in Figure 2.

| Amplitude (V)<br>Section number   | Waveform |     |      |     |     |
|-----------------------------------|----------|-----|------|-----|-----|
|                                   | A        | B   | C    | D   | E   |
| 1                                 | 84       | 84  | 80   | 84  | 84  |
| 2                                 | -42      | -42 | -    | -42 | -42 |
| 3                                 | 84       | 84  | -    | 84  | 84  |
| Pulsewidth (us)<br>Section number | Waveform |     |      |     |     |
|                                   | A        | B   | C    | D   | E   |
| 1                                 | 17       | 40  | 37.1 | 28  | 40  |
| 2                                 | 5        | 5   | -    | 5   | 5   |
| 3                                 | 14       | 10  | -    | 28  | 20  |
| Total Pulsewidth (us)             | 36       | 55  | 37.1 | 61  | 65  |

TABLE S2. Fitted parameters for each droplet shown in Figure 2.

|                            | Droplet         |                 |                 |                 |                  |
|----------------------------|-----------------|-----------------|-----------------|-----------------|------------------|
|                            | A               | B               | C               | D               | E                |
| Imaged Diameter (pixels)   | 16              | 23              | 36              | 45              | 51               |
| Radius (nm)                | $10700 \pm 5$   | $13420 \pm 14$  | $21020 \pm 45$  | $28100 \pm 150$ | $31400 \pm 1400$ |
| $n_A$                      | $1.33 \pm 0.01$ | $1.39 \pm 0.02$ | $1.35 \pm 0.03$ | $1.30 \pm 0.01$ | $1.31 \pm 0.6$   |
| $n_B$ (nm <sup>2</sup> )   | $2465 \pm 23$   | $-1033 \pm 27$  | $-637 \pm 81$   | $769 \pm 83$    | $355 \pm 99$     |
| Refractive index* (575 nm) | $1.34 \pm 0.04$ | $1.39 \pm 0.05$ | $1.35 \pm 0.14$ | $1.30 \pm 0.14$ | $1.31 \pm 0.18$  |

\*refractive index  $n(\lambda) = n_A + n_B/(\lambda^2)$

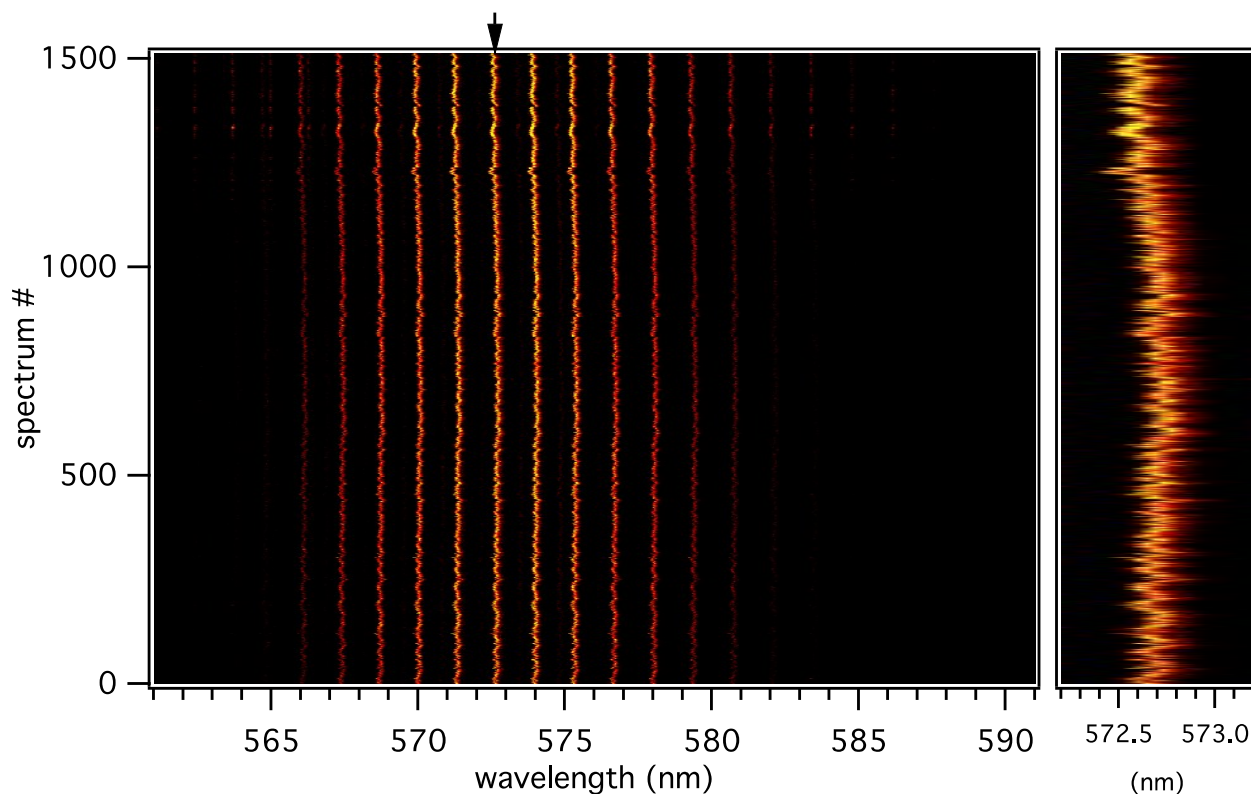

Figure S2 1500 consecutive single droplet fluorescence spectra. The microdroplets were generated using the square wave pulse labeled E in Figure 2. The inset shows an expansion of the single WGM peak marked with an arrow.

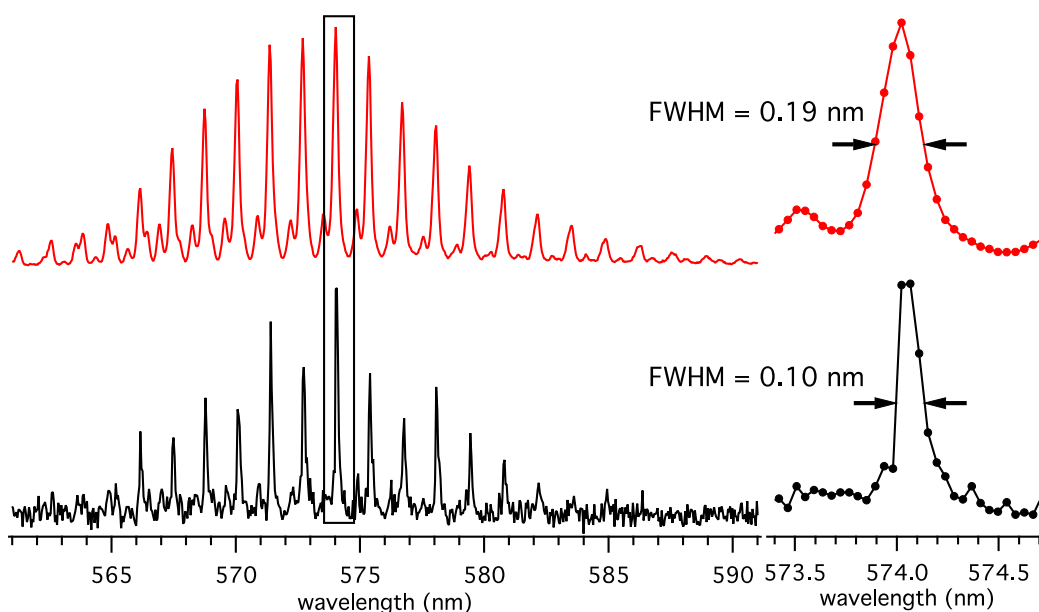

Figure S3 A single droplet fluorescence spectrum (bottom, black) to an average of 1500 single droplet spectra (top, red) from Figure S2.

TABLE S3. Experimental and simulated MDR positions used in the fitting of droplet C. In red are predicted positions.

| Experimental positions (nm) | Assignment   | Simulated position (nm) | Difference (nm) |
|-----------------------------|--------------|-------------------------|-----------------|
| 567.198                     | $TE_{273}^5$ | 567.177                 | 0.021           |
| 568.269                     | $TM_{278}^4$ | 568.295                 | -0.026          |
| 569.082                     | $TE_{272}^5$ | 569.079                 | 0.003           |
| 570.187                     | $TM_{277}^4$ | 570.191                 | -0.004          |
| 570.996                     | $TE_{271}^5$ | 570.994                 | 0.002           |
| 572.106                     | $TM_{276}^4$ | 572.101                 | 0.005           |
| 572.921                     | $TE_{270}^5$ | 572.922                 | -0.001          |
| 574.031                     | $TM_{275}^4$ | 574.023                 | 0.008           |
| 574.858                     | $TE_{269}^5$ | 574.863                 | -0.005          |
| 576.812                     | $TE_{268}^5$ | 576.817                 | -0.005          |
| 578.787                     | $TE_{267}^5$ | 578.785                 | 0.002           |
| 580.812                     | $TE_{266}^5$ | 580.767                 | 0.045           |
| 582.851                     | $TE_{265}^5$ | 582.763                 | 0.088           |
| 584.887                     | $TE_{264}^5$ | 584.772                 | 0.115           |
| -                           | $TE_{274}^5$ | 565.288                 | -               |
| -                           | $TM_{279}^4$ | 566.411                 | -               |
| -                           | $TM_{274}^4$ | 575.958                 | -               |
| -                           | $TE_{280}^4$ | 565.621                 | -               |
| -                           | $TE_{279}^4$ | 567.499                 | -               |
| -                           | $TE_{278}^4$ | 569.390                 | -               |
| -                           | $TE_{277}^4$ | 571.293                 | -               |
| -                           | $TE_{276}^4$ | 573.209                 | -               |
| -                           | $TE_{275}^4$ | 575.139                 | -               |
| -                           | $TE_{274}^4$ | 577.081                 | -               |
| -                           | $TE_{273}^4$ | 579.037                 | -               |
| -                           | $TE_{272}^4$ | 581.006                 | -               |
| -                           | $TE_{271}^4$ | 582.988                 | -               |
| -                           | $TE_{270}^4$ | 584.985                 | -               |

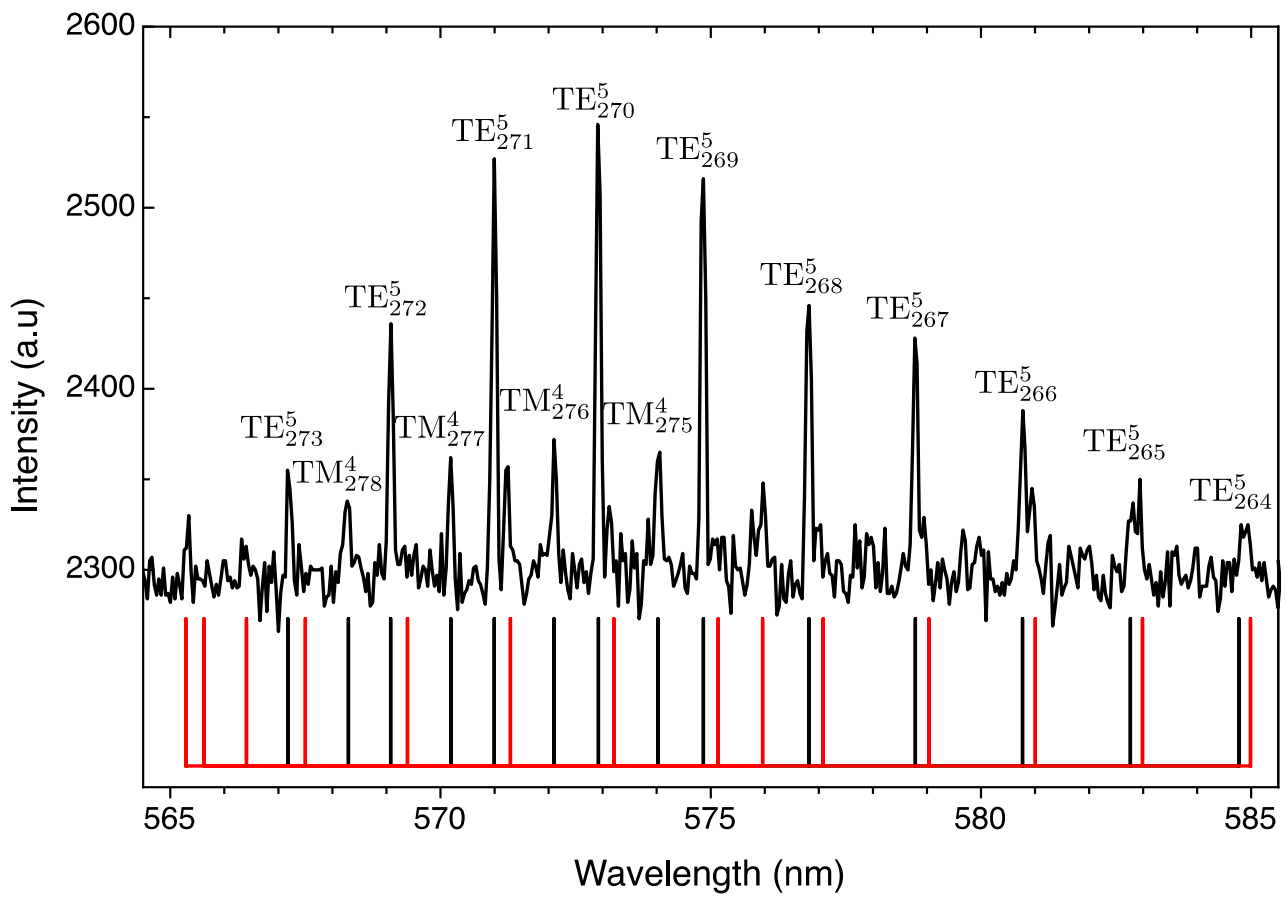

Figure S4 Single droplet emission spectrum using waveform C with WGM assignments. Black bars represent the fitted WGMs – data from Table S3. The red bars are predicted WGMs (as listed in Table III).

TABLE S4. Experimental and simulated MDR positions used in the fitting of droplet A.

| Experimental positions (nm) | Assignment   | Simulated position (nm) | Difference (nm) |
|-----------------------------|--------------|-------------------------|-----------------|
| 563.880                     | $TE_{137}^3$ | 563.859                 | 0.021           |
| 565.639                     | $TM_{136}^3$ | 565.625                 | 0.014           |
| 567.571                     | $TE_{136}^3$ | 567.567                 | 0.004           |
| 569.359                     | $TM_{135}^3$ | 569.362                 | -0.003          |
| 571.326                     | $TE_{135}^3$ | 571.326                 | 0.000           |
| 573.151                     | $TM_{134}^3$ | 573.151                 | 0.000           |
| 575.134                     | $TE_{134}^3$ | 575.137                 | -0.003          |
| 578.992                     | $TE_{133}^3$ | 579.001                 | -0.009          |
| 582.922                     | $TE_{132}^3$ | 582.919                 | 0.003           |
| 586.917                     | $TE_{131}^3$ | 586.893                 | 0.024           |
| 590.738                     | $TE_{136}^2$ | 590.763                 | -0.025          |
| 590.986                     | $TE_{130}^3$ | 590.923                 | 0.063           |
| 594.797                     | $TE_{135}^2$ | 594.789                 | 0.008           |
| 598.887                     | $TE_{134}^2$ | 598.871                 | 0.016           |
| -                           | $TE_{137}^2$ | 586.794                 | -               |

TABLE S5. Experimental and simulated MDR positions used in the fitting of droplet B.

| Experimental positions (nm) | Assignment   | Simulated position (nm) | Difference (nm) |
|-----------------------------|--------------|-------------------------|-----------------|
| 566.761                     | $TE_{170}^5$ | 566.744                 | 0.017           |
| 569.716                     | $TE_{169}^5$ | 569.706                 | 0.010           |
| 570.642                     | $TE_{174}^4$ | 570.644                 | -0.002          |
| 571.99                      | $TM_{173}^4$ | 571.944                 | 0.046           |
| 572.702                     | $TE_{168}^5$ | 572.700                 | 0.002           |
| 574.958                     | $TM_{172}^4$ | 574.934                 | 0.024           |
| 575.726                     | $TE_{167}^5$ | 575.726                 | 0               |
| 576.544                     | $TE_{172}^4$ | 576.624                 | -0.080          |
| 577.939                     | $TM_{171}^4$ | 577.957                 | -0.018          |
| 578.779                     | $TE_{166}^5$ | 578.784                 | -0.005          |
| 581.018                     | $TM_{170}^4$ | 581.011                 | 0.007           |
| 581.868                     | $TE_{165}^5$ | 581.876                 | -0.008          |
| 585.001                     | $TE_{164}^5$ | 585.002                 | -0.001          |
| 587.224                     | $TM_{168}^4$ | 587.220                 | 0.004           |
| 588.172                     | $TE_{163}^5$ | 588.162                 | 0.010           |
| 590.368                     | $TM_{167}^4$ | 590.375                 | -0.007          |
| 591.374                     | $TE_{162}^5$ | 591.357                 | 0.017           |
| 593.568                     | $TM_{166}^4$ | 593.564                 | 0.004           |

TABLE S6. Experimental and simulated MDR positions used in the fitting of droplet D.

| Experimental Positions (nm) | Assignment   | Simulated positions (nm) | Difference (nm) |
|-----------------------------|--------------|--------------------------|-----------------|
| 568.006                     | $TE_{359}^5$ | 568.001                  | 0.005           |
| 568.249                     | $TM_{365}^4$ | 568.248                  | 0.001           |
| 569.458                     | $TE_{358}^5$ | 569.461                  | -0.003          |
| 569.699                     | $TM_{364}^4$ | 569.702                  | -0.003          |
| 570.927                     | $TE_{357}^5$ | 570.929                  | -0.002          |
| 572.407                     | $TE_{356}^5$ | 572.405                  | 0.002           |
| 573.89                      | $TE_{355}^5$ | 573.889                  | 0.001           |
| 575.378                     | $TE_{354}^5$ | 575.380                  | -0.002          |
| 576.878                     | $TE_{353}^5$ | 576.879                  | -0.001          |
| 578.389                     | $TE_{352}^5$ | 578.387                  | 0.002           |
| 579.899                     | $TE_{351}^5$ | 579.902                  | -0.003          |
| 581.428                     | $TE_{350}^5$ | 581.426                  | 0.002           |

TABLE S7. Experimental and simulated MDR positions used in the fitting of droplet E.

| Experimental Positions (nm) | Assignment   | Simulated positions (nm) | Difference (nm) |
|-----------------------------|--------------|--------------------------|-----------------|
| 565.046                     | $TE_{416}^4$ | 565.024                  | 0.022           |
| 566.326                     | $TE_{415}^4$ | 566.302                  | 0.024           |
| 567.581                     | $TE_{414}^4$ | 567.587                  | -0.006          |
| 568.88                      | $TE_{413}^4$ | 568.877                  | 0.003           |
| 569.683                     | $TE_{420}^3$ | 569.721                  | -0.038          |
| 570.171                     | $TE_{412}^4$ | 570.173                  | -0.002          |
| 571.472                     | $TE_{411}^4$ | 571.475                  | -0.003          |
| 572.308                     | $TE_{418}^3$ | 572.312                  | -0.004          |
| 572.779                     | $TE_{410}^4$ | 572.783                  | -0.004          |
| 573.618                     | $TE_{417}^3$ | 573.616                  | 0.002           |
| 574.095                     | $TE_{409}^4$ | 574.097                  | -0.002          |
| 574.947                     | $TE_{416}^3$ | 574.926                  | 0.021           |
| 575.424                     | $TE_{408}^4$ | 575.418                  | 0.006           |
| 576.748                     | $TE_{407}^4$ | 576.744                  | 0.004           |
| 577.58                      | $TE_{414}^3$ | 577.565                  | 0.015           |
| 578.074                     | $TE_{406}^4$ | 578.077                  | -0.003          |
| 579.413                     | $TE_{405}^4$ | 579.416                  | -0.003          |
| 580.764                     | $TE_{404}^4$ | 580.761                  | 0.003           |
| 582.124                     | $TE_{403}^4$ | 582.113                  | 0.011           |

|         |              |         |       |
|---------|--------------|---------|-------|
| 583.486 | $TE_{402}^4$ | 583.471 | 0.015 |
| 584.862 | $TE_{401}^4$ | 584.835 | 0.027 |
